# Supplementary material for: Reduction of High Expressed Emotion and Treatment Outcomes in Anorexia Nervosa—Caregivers’ and Adolescents’ Perspective
Source: PubMed Central journal article supplement (PMC7409203; doi:10.3390/jcm9072021), 2020-06-27
Supplement: jcm-09-02021-s001.pdf [file jcm-09-02021-s001.pdf]

**Table S1.** Univariate linear regression predicting criticism and emotional overinvolvement (FQ parents) - slopes presented only.

| Predictor                          | FQ-CC<br>b(SE) | t(p)           | FQ-EOI<br>b(SE) | t(p)           |
|------------------------------------|----------------|----------------|-----------------|----------------|
| Female sex (parent) <sup>1</sup>   | -1.921(.191)   | -1.613 (.109)  | -1.826 (.092)   | -1.672 (.097)  |
| Age parent                         | 0.043 (.099)   | 0.433 (.666)   | 0.058 (.090)    | 0.640 (.523)   |
| GHQ total score                    | 0.496 (.117)   | 4.239 (<.001)  | 0.852 (.621)    | 9.541 (<.001)  |
| EDSIS total score                  | 0.220 (.026)   | 8.458 (<.001)  | 0.250 (.021)    | 12.171 (<.001) |
| CASK total score                   | -0.204(.029)   | -7.145 (<.001) | -0.183 (.497)   | -6.927 (<.001) |
| BDI total score                    | 0.202 (.059)   | 3.414 (.001)   | 0.393 (.032)    | 8.568 (<.001)  |
| STAI state score                   | 0.133 (.039)   | 3.400 (.001)   | 0.237 (.032)    | 7.513 (<.001)  |
| STAI trait score                   | 0.154 (.044)   | 3.472 (.001)   | 0.261 (.037)    | 7.115 (<.001)  |
| URICA precontemp.                  | -0.125(.099)   | -1.253 (.212)  | -0.270 (.089)   | -3.036 (.003)  |
| URICA contemp.                     | 0.213 (.078)   | 2.721 (.007)   | 0.340 (.067)    | 5.057 (<.001)  |
| URICA action                       | 0.242 (.087)   | 2.775 (.006)   | 0.274 (.078)    | 3.498 (.001)   |
| Time spent caregiving <sup>2</sup> | 0.538 (.995)   | 0.540 (.590)   | 0.739 (.940)    | 0.786 (.433)   |
| Age patient                        | 0.233 (.275)   | 0.849 (.397)   | 0.419 (.250)    | 1.675 (.096)   |
| Treatment type <sup>3</sup>        | 1.993 (.914)   | 2.180 (.031)   | 0.852 (.850)    | 1.003 (.317)   |
| ED duration                        | 0.062 (.034)   | 1.807 (.073)   | 0.038 (.032)    | 1.207 (.230)   |
| BMI Perc.cat <sup>4</sup>          | 1.220 (.910)   | 1.341 (.182)   | 0.852 (.833)    | 1.022 (.308)   |
| EDE total score                    | -0.386(.318)   | -1.212 (.227)  | 0.068 (.847)    | 0.080 (.936)   |
| EDI total score                    | 0.007 (.011)   | 0.674 (.501)   | 0.014 (.010)    | 1.477 (.142)   |

<sup>1</sup> 1 = female, 2 = male; <sup>2</sup> 1 = < 3h/day, 2 = ≥ 3h/day; <sup>3</sup> 1 = inpatient, 2 = outpatient, <sup>4</sup> 1 = ≤ 1<sup>st</sup> percentile, 2 = > 1<sup>st</sup> percentile; Abbreviations: BDI Beck Depression Inventory, CASK Caregiver Skills Scale, contemp. contemplation, EDE Eating Disorder Examination Interview, EDI-2 Eating Disorder Inventory-2, EDSIS Eating Disorders Symptoms Impact Scale, FQ-CC Family Questionnaire Criticism Score, FQ-EOI Family Questionnaire Emotional Overinvolvement Score, GHQ General Health Questionnaire, Perc.cat Percentile category, STAI State/Trait Anxiety Inventory, URICA University of Rhode Island Change Assessment Scale.

**Table S2.** Univariate linear regression predicting criticism and emotional overinvolvement (FEICS, patients) - slopes presented only.

| Predictor                          | FEICS-CC<br>b(SE) | t(p)          | FEICS-EOI<br>b(SE) | t(p)          |
|------------------------------------|-------------------|---------------|--------------------|---------------|
| Age parent                         | 0.102 (.074)      | 1.381 (.170)  | 0.120 (.073)       | 1.646 (.102)  |
| GHQ total score                    | 0.043 (.096)      | 0.450 (.654)  | 0.149 (.093)       | 1.596 (.113)  |
| EDSIS total score                  | 0.039 (.025)      | 1.563 (.120)  | 0.039 (.024)       | 1.584 (.115)  |
| CASK total score                   | -0.047 (.026)     | -1.809 (.073) | -0.005 (.026)      | -0.196 (.845) |
| BDI total score                    | 0.011 (.049)      | 0.223 (.824)  | 0.073 (.049)       | 1.510 (.134)  |
| STAI state score                   | -0.048 (.031)     | -1.562 (.121) | 0.036 (.031)       | 1.136 (.258)  |
| STAI trait score                   | 0.030 (.035)      | 0.859 (.392)  | 0.030 (.036)       | 0.852 (.396)  |
| URICA precontemp.                  | 0.035 (.079)      | 0.451 (.653)  | -0.149 (.075)      | -1.992 (.048) |
| URICA contemp.                     | -0.082 (.062)     | -1.323 (.188) | 0.090 (.060)       | 1.494 (.138)  |
| URICA action                       | -0.052 (.070)     | -0.750 (.454) | 0.106 (.067)       | 1.588 (.115)  |
| Time spent caregiving <sup>1</sup> | -0.640 (.799)     | -0.802 (.424) | 1.359 (.774)       | 1.755 (.081)  |
| Age patient                        | 0.275 (.210)      | 1.304 (.194)  | 0.235 (.208)       | 1.130 (.260)  |
| Treatment type <sup>2</sup>        | 0.731 (.721)      | 1.014 (.312)  | -0.739 (.710)      | -1.041 (.299) |
| ED duration                        | 0.062 (.029)      | 2.134 (.035)  | -0.035 (.029)      | -1.227 (.222) |
| BMI Perc.cat <sup>3</sup>          | 0.432 (.709)      | 0.609 (.544)  | -1.574 (.686)      | -2.293 (.023) |
| EDE total score                    | 0.777 (.243)      | 3.202 (.002)  | -0.240 (.246)      | -0.975 (.331) |
| EDI total score                    | 0.039 (.008)      | 5.098 (<.001) | -0.009 (.008)      | -1.083 (.281) |

<sup>1</sup> 1 = < 3h/day, 2 = ≥ 3h/day; <sup>2</sup> 1 = inpatient, 2 = outpatient, <sup>3</sup> 1 = ≤ 1<sup>st</sup> percentile, 2 = > 1<sup>st</sup> percentile; Abbreviations: BDI Beck Depression Inventory, CASK Caregiver Skills Scale, contemp. contemplation, EDE Eating Disorder Examination Interview, EDI-2 Eating Disorder Inventory-2, EDSIS Eating Disorders Symptoms Impact Scale, FQ-CC Family Questionnaire Criticism Score, FQ-EOI Family Questionnaire Emotional Overinvolvement Score, GHQ General Health Questionnaire, Perc.cat Percentile category, precontemp. precontemplation, STAI State/Trait Anxiety Inventory, URICA University of Rhode Island Change Assessment Scale.
